# Supplementary material
Source: Royal Society of Chemistry journal article supplement (doi:10.1039/d5lc01177a)
Supplement: d5lc01177a1.pdf [file d5lc01177a1.pdf]

## Supporting Information

### **Compact Superlattice as Label-free Surface-Enhanced Raman Scattering Substrate for Noninvasive Urine Test in the Diagnosis of Lung Cancer**

Kaili Zhang, ‡<sup>a</sup> Yuancai Ge, ‡<sup>b</sup> Yi Xu,<sup>d</sup> Yujie Liu,<sup>b</sup> Chaoyue Cui,<sup>b</sup> Yuxin Liang,<sup>b</sup> Yangxuan Lin,<sup>e</sup> Jungeng Zhang,<sup>e</sup> Qingwen Zhang,<sup>\*c</sup> Yi Wang,<sup>\*b,a,c</sup> Xiaoming Lin<sup>\*e</sup>

<sup>a</sup> School of Opto-Electronic Engineering, Changchun University of Science and Technology, Changchun, 130022, China.

<sup>b</sup> School of Biomedical Engineering, School of Ophthalmology & Optometry, Wenzhou Medical University, Wenzhou, 325027, China.

<sup>c</sup> Wenzhou Institute, University of Chinese Academy of Sciences, Wenzhou, 325001, China.

<sup>d</sup> School of Optoelectronic Engineering, Guilin University of Electronic Technology, Guilin 541004, China.

<sup>e</sup> Department of Thoracic Surgery, the First Affiliated Hospital of Wenzhou Medical University, Wenzhou, 325000, China.

† Electronic supplementary information (ESI) available. See DOI:

‡ These authors contributed equally to this work.

\* Corresponding authors: Qingwen Zhang, Yi Wang, Xiaoming Lin

E-mail address: zhangqw@wiucas.ac.cn(Q. Zhang), yiwang@wmu.edu.cn(Y. Wang), linxiaoming@wmu.edu.cn(X. Lin)

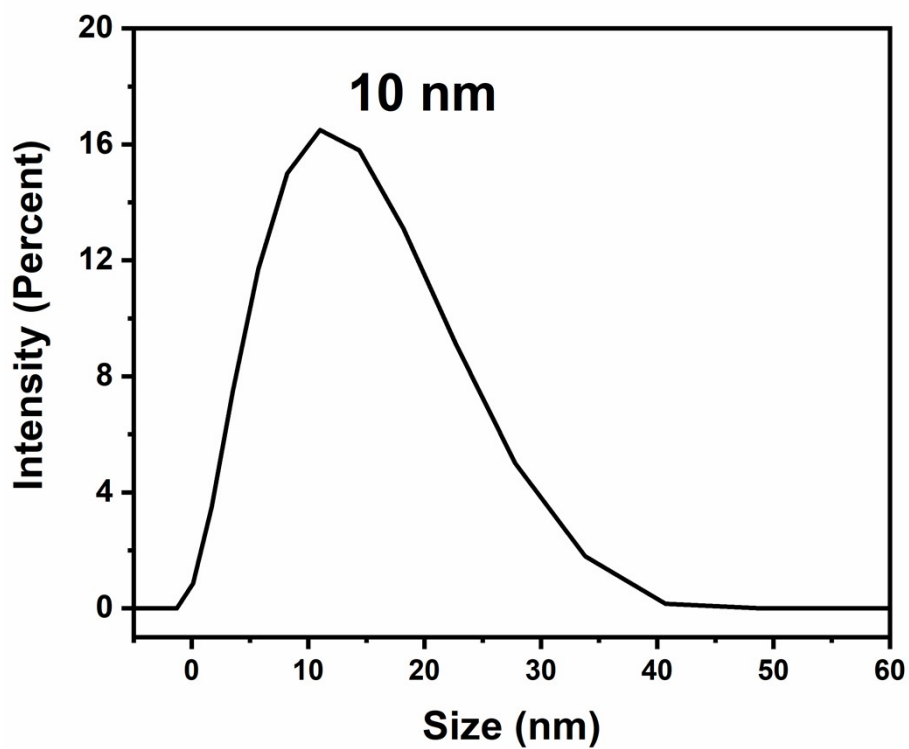

**Fig.S1** Dynamic light scattering of the as-prepared Au seeds dispersed in 200  $\mu$ L DI water.

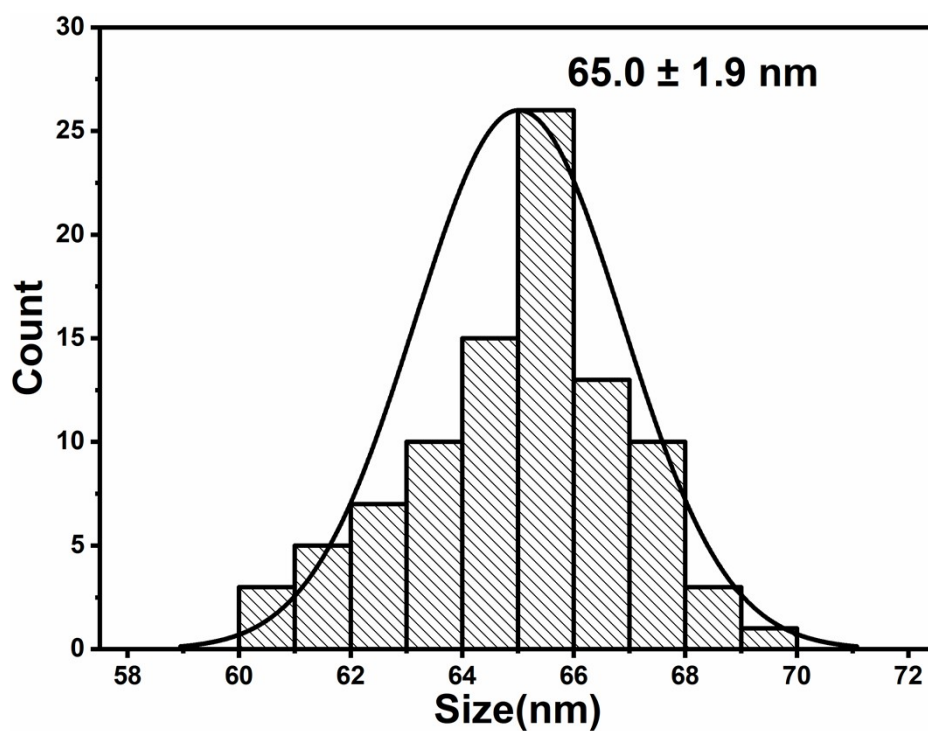

**Fig.S2** Histogram of nanoparticle size distribution of the as-prepared Au RDs obtained from SEM images.

The size of the histogram of nanoparticle size distribution (65 nm) is the same as the size observed by TEM and SEM (65 nm).

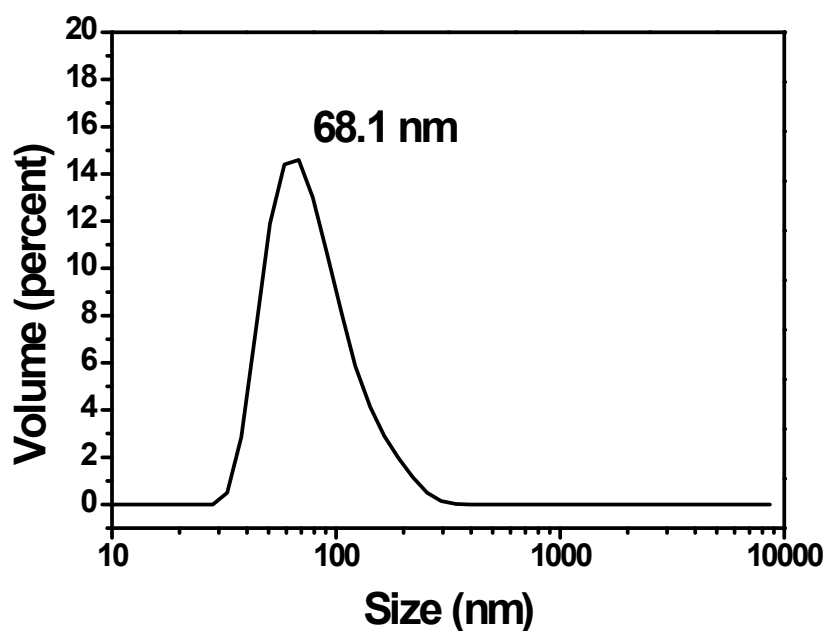

**Fig. S3** Dynamic light scattering of the as-prepared Au RDs dispersed in 200  $\mu$ L DI water. PDI=0.08.

DLS measurement was carried by dissolving 25  $\mu$ L concentrated Au RD NCs solution in 2.5 mL deionized water and sonicated for 2 min to form a light purple solution. Due to the hydrodynamic interactions, the size (68.1 nm) recorded with DLS is a little larger than the size (65 nm) observed with TEM and SEM.

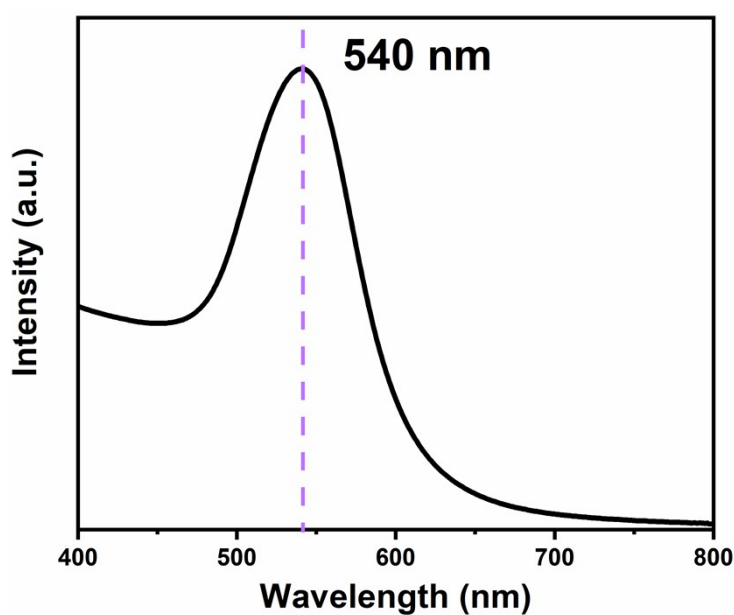

**Fig. S4** UV-Vis spectra of the as-prepared Au RDs measured in water.

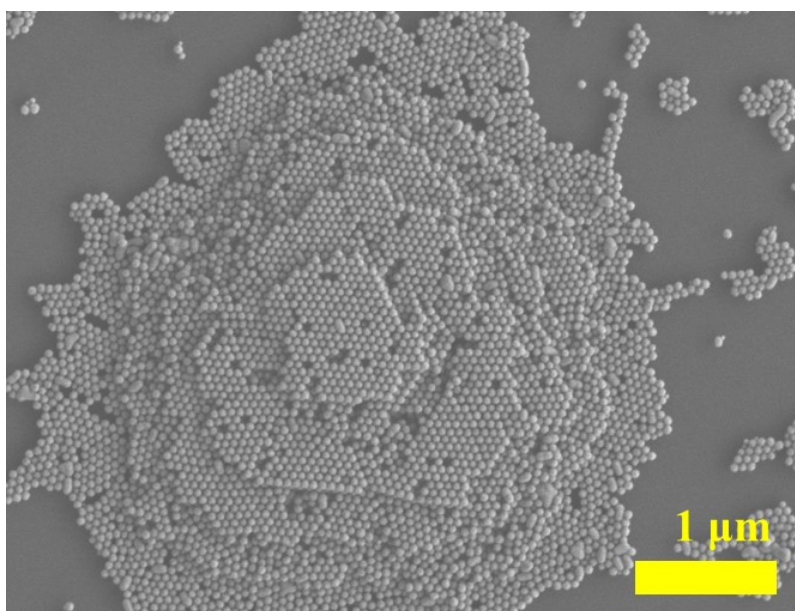

**Fig. S5** Au superlattice constructed with Au RDs concentration of 0.5 nM.

By decreasing the concentration of Au RDs solution from 2.75 nM to 0.5 nM, lots of defects can be observed in the central area of the Au superlattice, which may reduce the intensity of the SERS signal. Thus, the superlattice adopted in this study is fabricated by using 2.75 nM Au RDs solution.

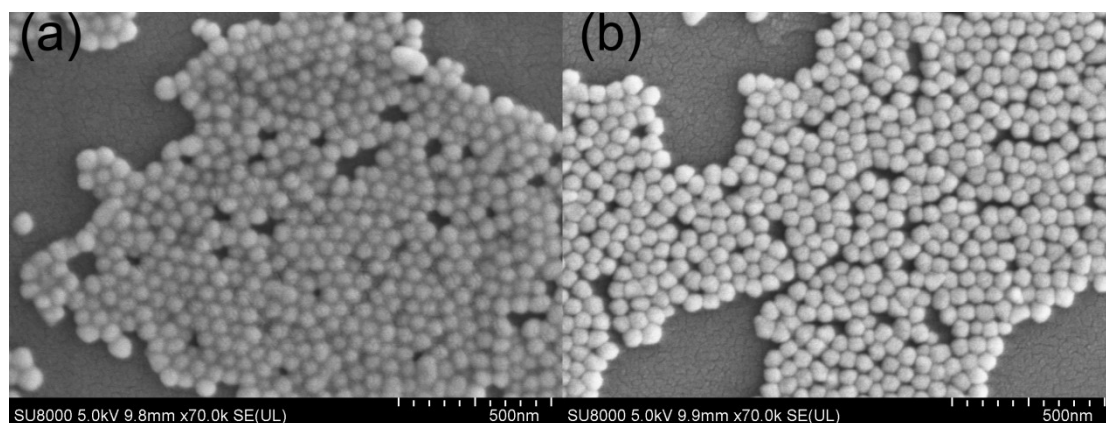

**Fig. S6** SEM images of Au RDs before (a) and after (b) plasma treatment.

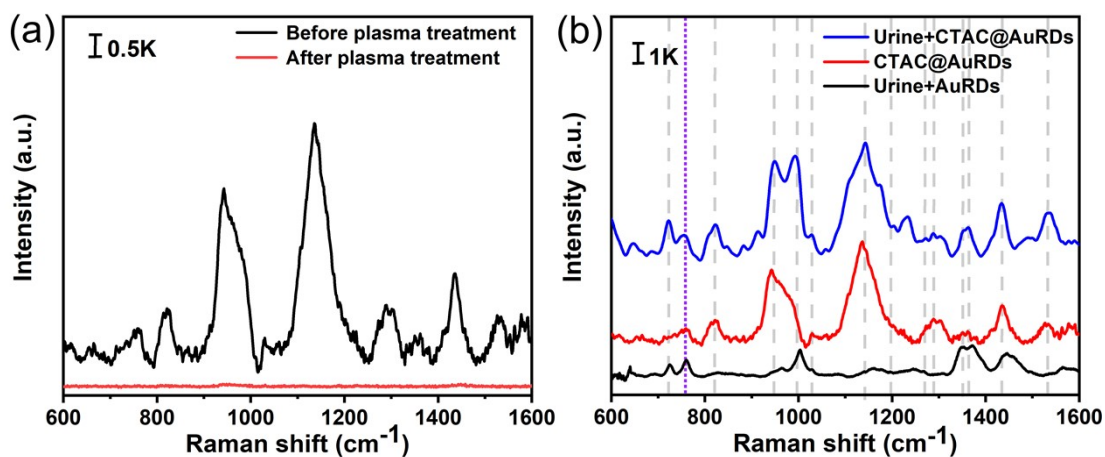

**Fig. S7** SERS signals of superlattice before and after treated with plasma for 3 minutes(a), and SERS signals of the untreated superlattice (CTAC@AuRDs) measured with urine samples (urine+CTAC@AuRDs), and plasma treated superlattice measured with urine samples (Urine+AuRDs) (b).

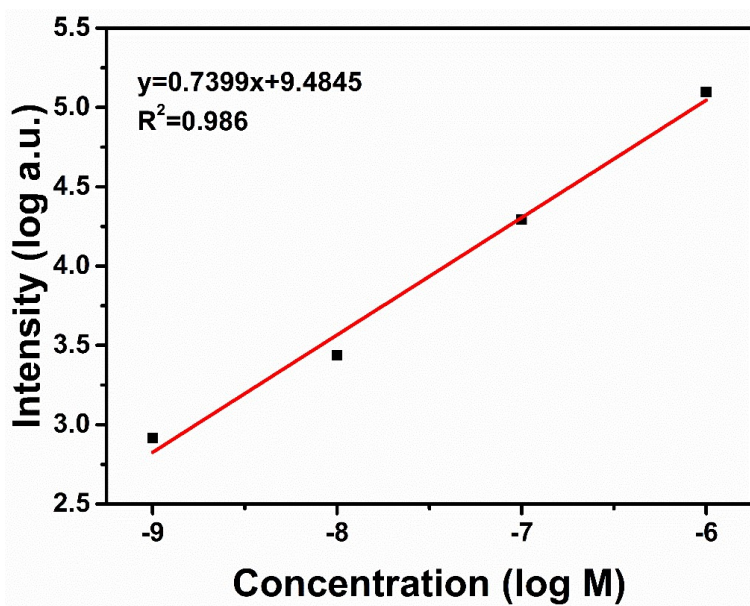

**Fig. S8** Linear correlation curve of Raman intensities at 1648 cm<sup>-1</sup> with the different concentrations of R6G.

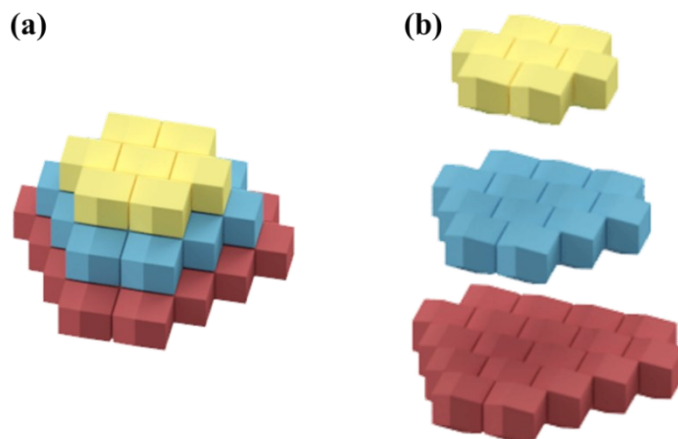

**Fig. S9** (a) 3D model of the Au compact superlattice. Each layer of the superlattice is also shown in (b) for a clear view of the compact superlattice.

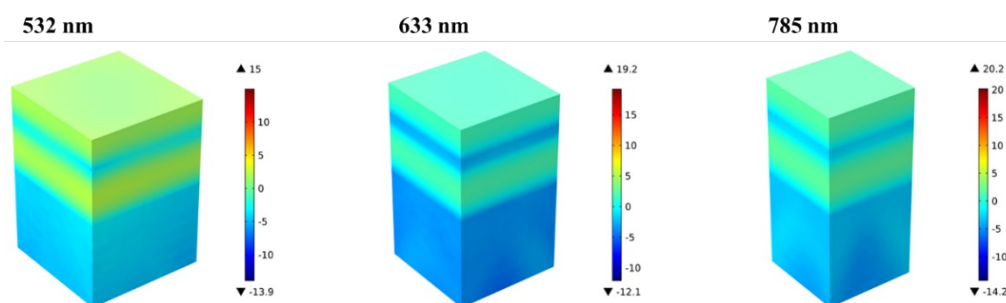

**Fig. S10** The distribution of SERS-EF with different excitation wavelengths (532 nm, 633 nm, and 785 nm) in the calculation domain of the numerical simulation.

The enhancement factor (EF) was typically calculated based on the following formula, on case 4-aminothiophene (4-ATP) was used as the probe molecule:

$$EF = (I_{1080\text{-}1}/N_{4\text{-}ATP})/(I_{RS}/N_{RS}).$$

Where  $I_{1080\text{cm}^{-1}}$  is the measured SERS intensity of 4-ATP at  $1080\text{ cm}^{-1}$ ,  $N_{4\text{-}ATP}$  is the number of 4-ATP molecules adsorbed on the SERS substrate in each measurement,  $I_{RS}$  is the measured Raman intensity of 4-ATP powder at the  $1080\text{ cm}^{-1}$  band in a normal Raman spectrum,  $N_{RS}$  is the number of 4-ATP molecules measured in the normal Raman measurement without enhancement. Based on the measured SERS intensity, the

average amount of 4-ATP applied to the substrate, the measured Raman intensity, corresponding amount of 4-ATP powder, and laser spot size ( $1.3 \mu\text{m}$ ), the EF is calculated to be approximately  $2.8 \times 10^7$ .

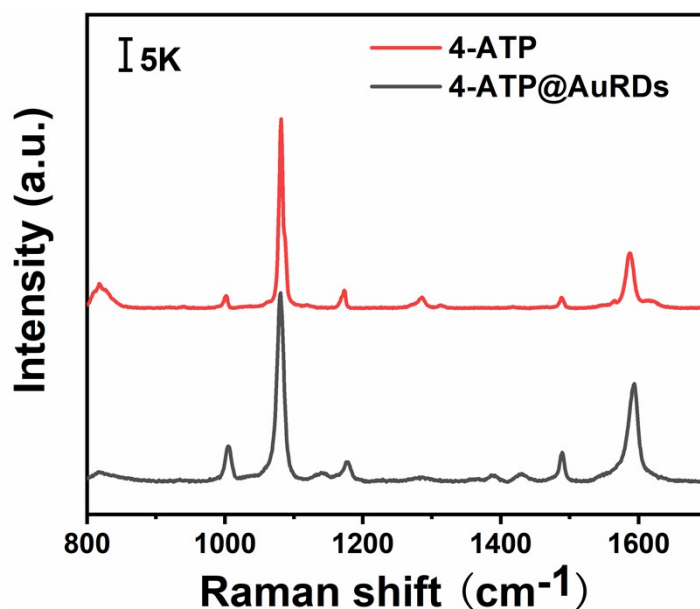

**Fig. S11** Raman spectra of 4-ATP powder with the number of molecules  $N_{RS}=6 \times 10^{11}$ , and the SERS spectra of 4-ATP on the Au RDs substrates, with estimated number of molecules  $N_{4-ATP}=2 \times 10^4$ .

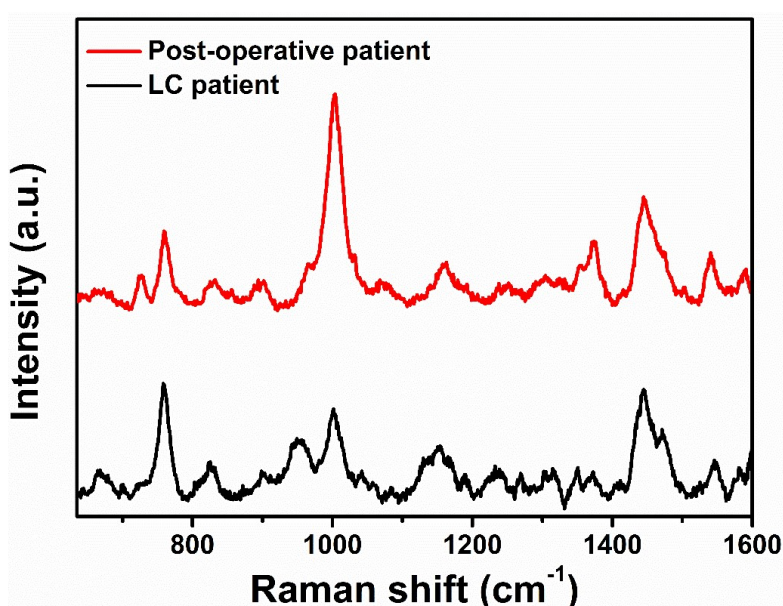

**Fig. S12** SERS spectra obtained from a same LC patient diagnosed with minimally invasive adenocarcinoma before (black curve) and after surgery (red curve).

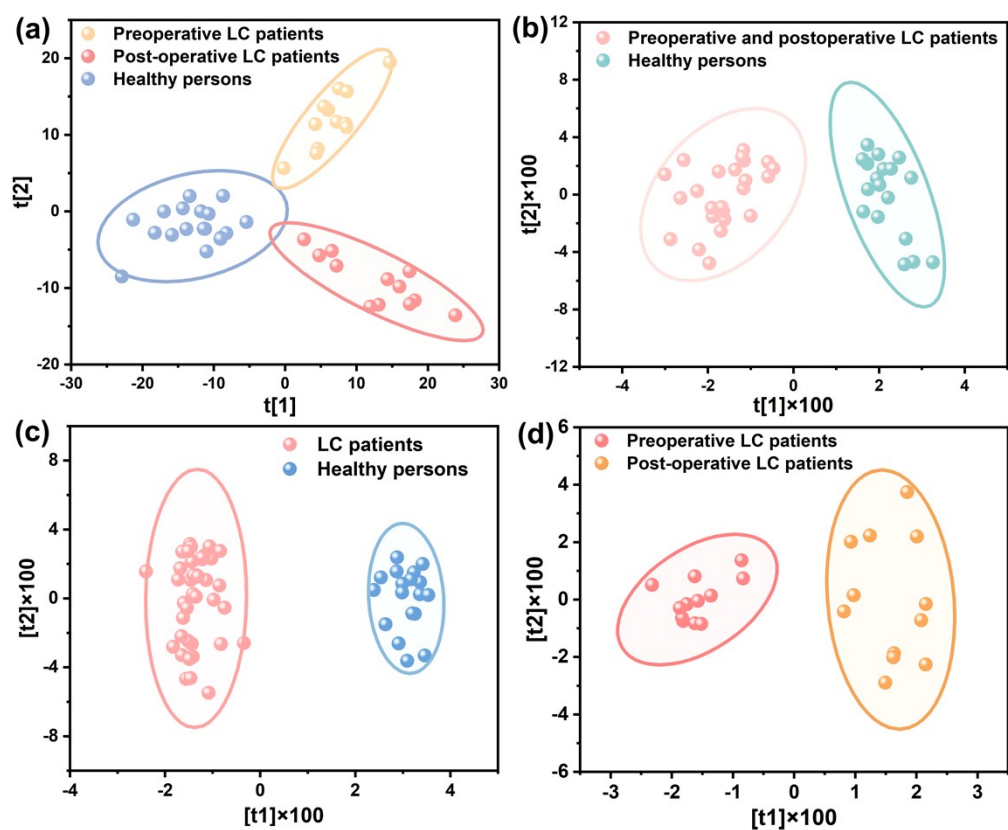

**Fig. S13** The OPLS-DA plot for the urine samples from 12 LC patients before and after operation, and 18 healthy persons (a). The OPLS-DA plot for the urine samples from LC patients (24 preoperative and post-operative LC patients) and 18 healthy persons (b). The OPLS-DA plot for 12 LC patients before and after operation (c). The OPLS-DA plot for 41 LC patients and 18 healthy persons (d).

**Table S1** Clinical characteristics of the studied samples in this work

| Sample | State         | Age | Gender | Characteristics                                           | Size of nodules (cm*cm) | Number of nodules | CEA (μg/L) | Keratin 21-1 (μg/L) | SCCA (μg/L) | Total bilirubin(μmol/L) | Direct bilirubin(μmol/L) | Urea/Creatine | Blood urea nitrogen (mmol/L) | Creatine (μmol/L) |
|--------|---------------|-----|--------|-----------------------------------------------------------|-------------------------|-------------------|------------|---------------------|-------------|-------------------------|--------------------------|---------------|------------------------------|-------------------|
| 1#     | Preoperation  | 40  | Female | Adenocarcinoma                                            | 0.8*0.8                 | 1                 | 2.4        | 1.7                 | 0.9         | 17                      | 5                        | 13.8          | 3.8                          | 68                |
| 2#     | Preoperation  | 51  | Female | Minimally invasive adenocarcinoma                         | 1.6*1.1                 | 1                 | 0.6        | 0.8                 | 0.4         | 9                       | 3                        | 22.9          | 5                            | 54                |
| 3#     | Preoperation  | 57  | Female | Invasive adenocarcinoma                                   | 2.4*1.5                 | 1                 | 0.7        | 2.8                 | 0.7         | 9                       | 3                        | 20.6          | 6                            | 72                |
| 4#     | Preoperation  | 42  | Male   | Minimally invasive adenocarcinoma                         | 0.8*0.8                 | 1                 | 1.9        | 2                   | 1           | 18                      | 6                        | 13.6          | 4.9                          | 89                |
| 5#     | Preoperation  | 51  | Female | Adenocarcinoma in situ/ Minimally Invasive adenocarcinoma | 1.2*1.2/0.6*0.6         | 2                 | 0.9        | 2                   | 1.5         | 12                      | 3                        | 17.3          | 3.9                          | 56                |
| 6#     | Preoperation  | 60  | Female | Minimally invasive adenocarcinoma *                       | *                       | 1                 | 0.7        | 2                   | 2           | 13                      | 5                        | 12.6          | 3.3                          | 65                |
| 7#     | Preoperation  | 68  | Female | Minimally invasive adenocarcinoma                         | 0.8*0.8                 | 1                 | 1.5        | 2.7                 | 1.5         | 6                       | 2                        | 22.1          | 4.9                          | 55                |
| 8#     | Preoperation  | 71  | Female | *                                                         | *                       | *                 | *          | *                   | *           | *                       | *                        | *             | *                            | *                 |
| 9#     | Preoperation  | 60  | Female | Minimally invasive adenocarcinoma                         | 4*3                     | 1                 | 3.4        | 3.3                 | 0.9         | 8                       | 2                        | 26.2          | 5.4                          | 51                |
| 10#    | Preoperation  | 35  | Male   | *                                                         | *                       | *                 | *          | *                   | *           | *                       | *                        | *             | *                            | *                 |
| 11#    | Preoperation  | 68  | Male   | *                                                         | *                       | *                 | *          | *                   | *           | *                       | *                        | *             | *                            | *                 |
| 12#    | Preoperation  | 59  | Male   | Minimally invasive adenocarcinoma                         | 1.3*0.7                 | 1                 | 2.1        | 2.8                 | 0.7         | 13                      | 5                        | 22.3          | 7.1                          | 29                |
| 13#    | Preoperation  | 44  | Female | Adenocarcinoma in situ                                    | 0.5*0.5/0.5*0.5         | 2                 | 1.6        | 2.9                 | 4.3         | 5                       | 2                        | 19            | 22.2                         | 289               |
| 14#    | Preoperation  | 54  | Male   | Squamous cell carcinoma                                   | *                       | *                 | 9.19       | 10.81               | 14.2        | *                       | *                        | *             | *                            | *                 |
| 15#    | Preoperation  | 58  | Male   | Adenocarcinoma                                            | *                       | *                 | 15.24      | 5.34                | *           | *                       | *                        | *             | *                            | *                 |
| 16#    | Preoperation  | 69  | Male   | Adenocarcinoma                                            | *                       | *                 | 119.1      | *                   | *           | *                       | *                        | *             | *                            | *                 |
| 17#    | Preoperation  | 64  | Female | Adenocarcinoma                                            | *                       | *                 | *          | *                   | *           | *                       | *                        | *             | *                            | *                 |
| 18#    | Preoperation  | 77  | Female | *                                                         | *                       | *                 | 5.61       | 4.15                | *           | *                       | *                        | *             | *                            | *                 |
| 19#    | Preoperation  | 60  | Female | *                                                         | *                       | *                 | *          | *                   | *           | *                       | *                        | *             | *                            | *                 |
| 20#    | Preoperation  | 74  | Male   | Squamous cell carcinoma                                   | *                       | *                 | *          | 94.33               | *           | *                       | *                        | *             | *                            | *                 |
| 21#    | Preoperation  | 44  | Male   | *                                                         | *                       | *                 | *          | *                   | *           | *                       | *                        | *             | *                            | *                 |
| 22#    | Preoperation  | 69  | Male   | Adenocarcinoma                                            | *                       | *                 | *          | 4.59                | *           | *                       | *                        | *             | *                            | *                 |
| 23#    | Preoperation  | 47  | Male   | *                                                         | *                       | *                 | 12.87      | 8.81                | 1.9         | *                       | *                        | *             | *                            | *                 |
| 24#    | Preoperation  | 62  | Male   | Squamous cell carcinoma                                   | *                       | *                 | 6.5        | 33.6                | *           | *                       | *                        | *             | *                            | *                 |
| 25#    | Preoperation  | 65  | Male   | Adenocarcinoma                                            | *                       | *                 | *          | *                   | *           | *                       | *                        | *             | *                            | *                 |
| 26#    | Preoperation  | 57  | Male   | Invasive adeno carcinoma                                  | *                       | *                 | 28.4       | 6.19                | *           | *                       | *                        | *             | *                            | *                 |
| 27#    | Preoperation  | 66  | Male   | Squamous cell carcinoma                                   | *                       | *                 | *          | 5.27                | *           | *                       | *                        | *             | *                            | *                 |
| 28#    | Preoperation  | 65  | Male   | Adenocarcinoma                                            | *                       | *                 | *          | *                   | *           | *                       | *                        | *             | *                            | *                 |
| 29#    | Preoperation  | 56  | Male   | Minimally invasive adenocarcinoma                         | *                       | *                 | *          | *                   | *           | *                       | *                        | *             | *                            | *                 |
| 30#    | Postoperation | 66  | Male   | *                                                         | *                       | *                 | *          | *                   | *           | *                       | *                        | *             | *                            | *                 |
| 31#    | Postoperation | 68  | Female | *                                                         | *                       | *                 | 3          | *                   | *           | 6                       | 2                        | 9.9           | 2.2                          | 55                |

|     |               |    |        |   |   |   |     |     |     |    |   |      |      |     |
|-----|---------------|----|--------|---|---|---|-----|-----|-----|----|---|------|------|-----|
| 32# | Postoperation | 40 | Female | * | * | * | 2.7 | *   | *   | 11 | 4 | 7.7  | 1.7  | 47  |
| 33# | Postoperation | 51 | Female | * | * | * | 0.8 | *   | *   | 8  | 2 | 10.5 | 2    | 47  |
| 34# | Postoperation | 60 | Female | * | * | * | 0.6 | 2.7 | 0.7 | 12 | 4 | 14.2 | 4    | 70  |
| 35# | Postoperation | 42 | Male   | * | * | * | 3   | *   | *   | 14 | 6 | 11.1 | 5.2  | 97  |
| 36# | Postoperation | 57 | Female | * | * | * | 0.7 | *   | *   | 7  | 2 | 15.1 | 3.6  | 59  |
| 37# | Postoperation | 51 | Female | * | * | * | 0.7 | *   | *   | 9  | 3 | 36.3 | 6.6  | 45  |
| 38# | Postoperation | 60 | Female | * | * | * | 1.3 | 1.7 | 0.5 | 10 | 4 | 27.9 | 5.4  | 48  |
| 39# | Postoperation | 59 | Male   | * | * | * | 1.5 | *   | 1.1 | 12 | 4 | 16   | 6    | 93  |
| 40# | Postoperation | 44 | Female | * | * | * | *   | *   | *   | 5  | 2 | 22.1 | 13.3 | 273 |
| 41# | Postoperation | *  | Male   | * | * | * | *   | *   | *   | *  | * | *    | *    | *   |
| 42# | Healthy       | 46 | Male   | * | * | * | *   | *   | *   | *  | * | *    | *    | *   |
| 43# | Healthy       | 28 | Male   | * | * | * | *   | *   | *   | *  | * | *    | *    | *   |
| 44# | Healthy       | 44 | Female | * | * | * | *   | *   | *   | *  | * | *    | *    | *   |
| 45# | Healthy       | 62 | Female | * | * | * | *   | *   | *   | *  | * | *    | *    | *   |
| 46# | Healthy       | 55 | Female | * | * | * | *   | *   | *   | *  | * | *    | *    | *   |
| 47# | Healthy       | 43 | Female | * | * | * | *   | *   | *   | *  | * | *    | *    | *   |
| 48# | Healthy       | 39 | Male   | * | * | * | *   | *   | *   | *  | * | *    | *    | *   |
| 49# | Healthy       | 64 | Female | * | * | * | *   | *   | *   | *  | * | *    | *    | *   |
| 50# | Healthy       | 72 | Male   | * | * | * | *   | *   | *   | *  | * | *    | *    | *   |
| 51# | Healthy       | 51 | Male   | * | * | * | *   | *   | *   | *  | * | *    | *    | *   |
| 52# | Healthy       | 57 | Female | * | * | * | *   | *   | *   | *  | * | *    | *    | *   |
| 53# | Healthy       | 49 | Female | * | * | * | *   | *   | *   | *  | * | *    | *    | *   |
| 54# | Healthy       | 58 | Male   | * | * | * | *   | *   | *   | *  | * | *    | *    | *   |
| 55# | Healthy       | 61 | Female | * | * | * | *   | *   | *   | *  | * | *    | *    | *   |
| 56# | Healthy       | 54 | Male   | * | * | * | *   | *   | *   | *  | * | *    | *    | *   |
| 57# | Healthy       | 68 | Male   | * | * | * | *   | *   | *   | *  | * | *    | *    | *   |
| 58# | Healthy       | 75 | Male   | * | * | * | *   | *   | *   | *  | * | *    | *    | *   |
| 59# | Healthy       | 48 | Female | * | * | * | *   | *   | *   | *  | * | *    | *    | *   |

\* denotes the information that is unavailable. CEA and SCCA are the abbreviations of carcinoembryonic antigen and squamous cell carcinoma antigen, respectively.

Among the 59 research samples, the top 29 were LC patients, the middle yellow part was 12 postoperative LC patients, and the last blue part was 18 healthy individuals. Among them, 29 LC patients mainly had adenocarcinoma (including adenocarcinoma in situ (AIS), minimally invasive adenocarcinoma (MIA), and invasive adenocarcinoma (IAC)) and squamous cell carcinoma.

The 'characteristics' column represents the characteristics of LC patients, while the 'Size of nodules' column represents the size of the corresponding patient's nodules. The Number of nodules column is the number of nodules corresponding to the patient. Then, the rest columns are their corresponding concentrations of carcinoembryonic antigen (CEA), Keratin 21-1, and squamous cell carcinoma antigen (SCCA), Total bilirubin, Direct bilirubin, Urea/Creatine, Blood urea nitrogen, and Creatine in serum.

**Table S2** Major SERS peaks of urine samples and tentative vibrational mode assignments

| Peak position (cm <sup>-1</sup> ) | Vibrational modes                                    | Tentative assignments                       | Reference |
|-----------------------------------|------------------------------------------------------|---------------------------------------------|-----------|
| 660                               | C-S stretching                                       | Cystine                                     | 1,2       |
| 685                               | C-H vibration                                        | Thymidine                                   | 3         |
| 725                               | C-H vibration, N-N vibration                         | Adenosine                                   | 3         |
| 759                               | Symmetric breathing                                  | Tryptophan                                  | 4         |
| 786                               | Ring breathing mode                                  | Purine nucleoside                           | 3         |
| 930~965                           | Skeletal C-C vibration                               | Amino acids                                 | 1,5       |
| 1002                              | C-C ring stretching/C-N stretching                   | Amino acids/Urea                            | 6         |
| 1082                              | P-O stretching of HPO <sub>4</sub> <sup>2-</sup>     | Phosphorous salts/<br>phosphodiester groups | 1,7       |
| 1148                              | H-C-H twisting and rock                              | Phenylalanine                               | 3         |
| 1270                              | C-N stretching                                       | Amide                                       | 1         |
| 1288                              | C-N stretching                                       | Cytosine                                    | 8         |
| 1343~1400                         | Ring breathing/C-H twist vibration/ COO <sup>-</sup> | DNA/RNA bases/Amino acids                   | 9,10      |
| 1462                              | C-H bending/C-N stretching                           | Adenine                                     | 4         |
| 1542                              | C=C vibration/NH <sub>2</sub> vibration              | Adenosine/<br>Phenylalanine                 | 3         |

## References

- 1 Z Movasaghi, S Rehman, IU Rehman, Raman Spectroscopy of Biological Tissues, *Appl. Spectrosc. Rev.*, 2007, **42**, 493-541.
- 2 N Stone, C Kendall, N Shepherd, P Crow, H Barr, Near-infrared Raman spectroscopy for the classification of epithelial pre-cancers and cancers, *J. Raman Spectrosc.*, 2002, **33**, 564-573.
- 3 X Lin, L Wang, H Lin, A novel urine analysis technique combining affinity chromatography with Au nanoparticle based surface enhanced Raman spectroscopy for potential applications in non-invasive cancer screening, *J. Biophotonics*, 2019, **12**, e201800327.

- 4 N Stone, C Kendall, J Smith, P Crow, H Barr, Raman spectroscopy for identification of epithelial cancers, *Faraday Discuss.*, 2004, **126**, 141-157; discussion 169-183.
- 5 DP Lau, Z Huang, H Lui, Raman spectroscopy for optical diagnosis in normal and cancerous tissue of the nasopharynx—preliminary findings, *Lasers in Surgery and Medicine*, 2003, **32**, 210-214.
- 6 E Ó Faoláin, MB Hunter, JM Byrne, A study examining the effects of tissue processing on human tissue sections using vibrational spectroscopy, *Vib. Spectrosc.*, 2005, **38**, 121-127.
- 7 E Gazi, J Dwyer, P Gardner, Applications of Fourier transform infrared microspectroscopy in studies of benign prostate and prostate cancer. A pilot study, *J. Pathol.*, 2003, **201**, 99-108.
- 8 AJ Ruiz-Chica, MA Medina, F Sánchez-Jiménez, FJ Ramírez, Characterization by Raman spectroscopy of conformational changes on guanine–cytosine and adenine–thymine oligonucleotides induced by aminoxy analogues of spermidine, *J. Raman Spectrosc.*, 2004, **35**, 93-100.
- 9 I Notingher, C Green, C Dyer, Discrimination between ricin and sulphur mustard toxicity in vitro using Raman spectroscopy, *J. R. Soc. Interface* 2004, **1**, 79-90.
- 10 G Shetty, C Kendall, N Shepherd, N Stone, H Barr, Raman spectroscopy: elucidation of biochemical changes in carcinogenesis of oesophagus, *J. Cancer*, 2006, **94**, 1460-1464.
